# Supplementary material for: Obesity modulates the association between sleep apnea treatment and CHI3L1 levels but not CHIT1 activity in moderate to severe OSA: an observational study
Source: Springer Nature journal article supplement (doi:10.1007/s11325-018-1731-6), 2018-10-11
Supplement: MOESM1 [file 16191604]

## Supplemental material

Obesity modulates the association between sleep apnea treatment and CHI3L1 levels but not CHIT1 activity.

Authors: Unnur Dilja Teitsdottir<sup>1</sup>, Erna Sif Arnardottir<sup>2,3</sup>, Erla Bjornsdottir<sup>3,4</sup>, Thorarinn Gislason<sup>2,3</sup>, Petur Henry Petersen<sup>1</sup>

### Affiliations:

<sup>1</sup>Faculty of Medicine, Department of Biochemistry and Molecular Biology, Biomedical Center, University of Iceland, Reykjavik, Iceland.

<sup>2</sup>Faculty of Medicine, University of Iceland, Reykjavik, Iceland.

<sup>3</sup>Sleep Department, Landspítali - The National University Hospital of Iceland, Reykjavik, Iceland.

<sup>4</sup>Reykjavik University, Reykjavik, Iceland.

Corresponding author is Unnur Diljá Teitsdóttir, email: [udt1@hi.is](mailto:udt1@hi.is)

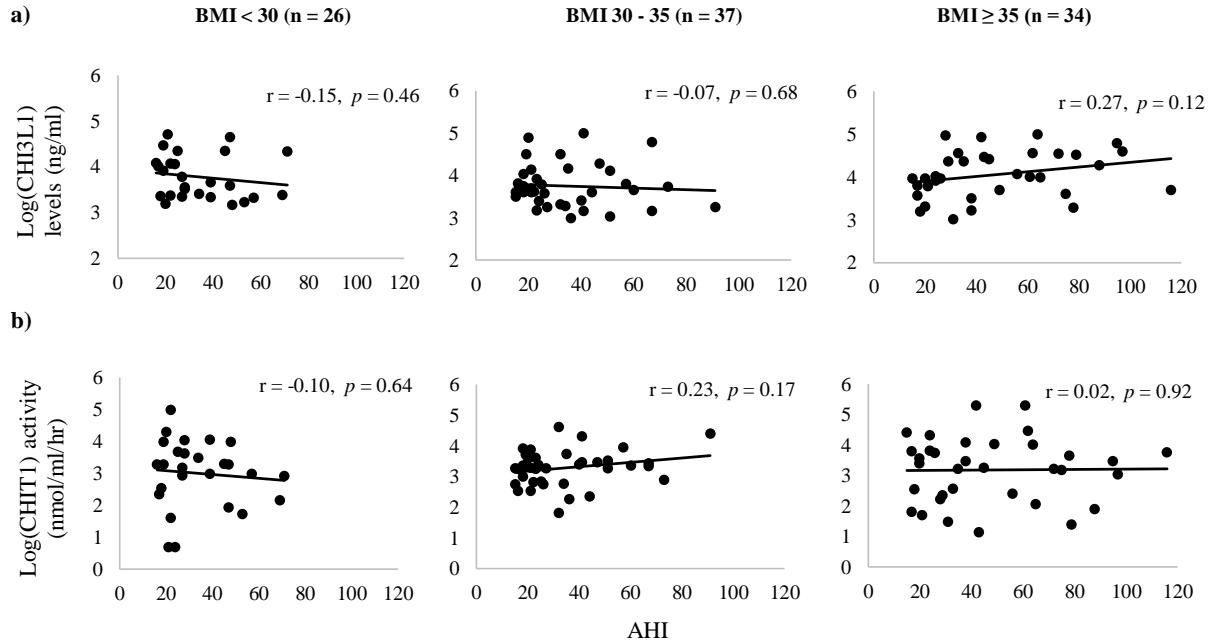

**Fig. S1.** Correlation between the apnea-hypopnea index (AHI) and a) CHI3L1 levels and b) CHIT1 activity within the 3 BMI categories.

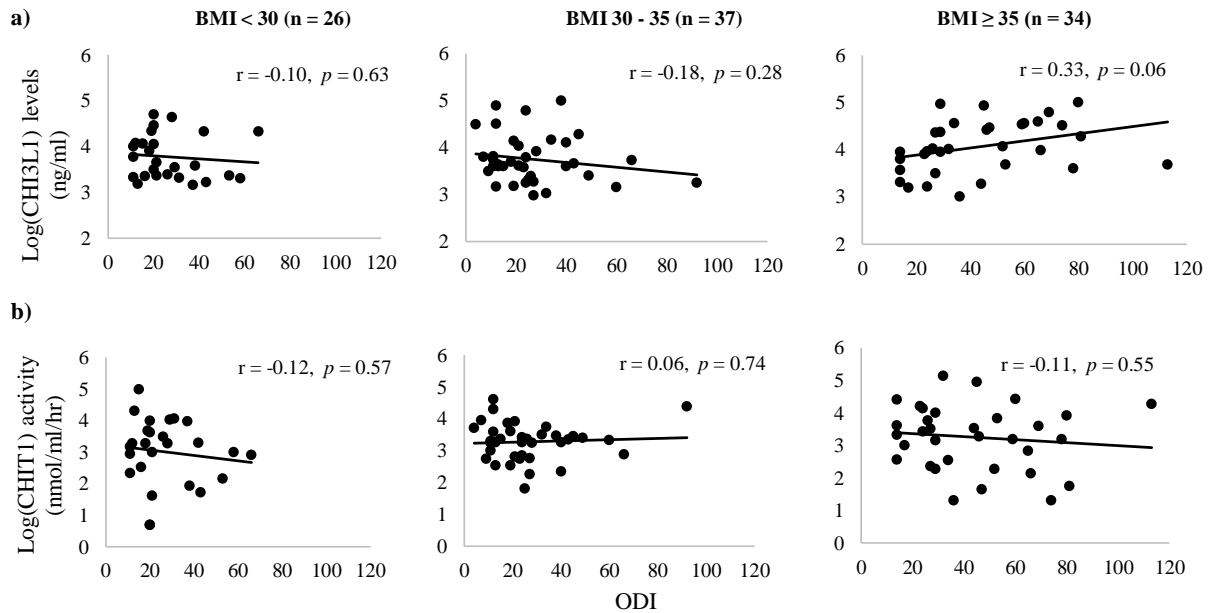

**Fig. S2.** Correlation between the oxygen-desaturation index (ODI) and a) CHI3L1 levels and b) CHIT1 activity within the 3 BMI categories.

a)

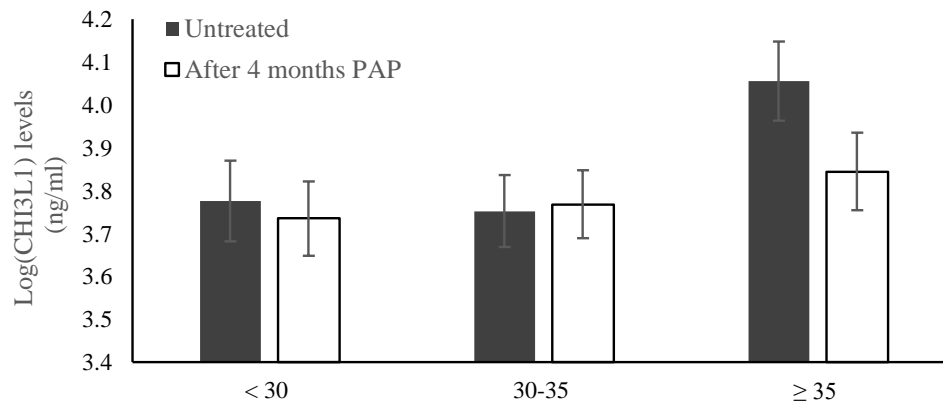

b)

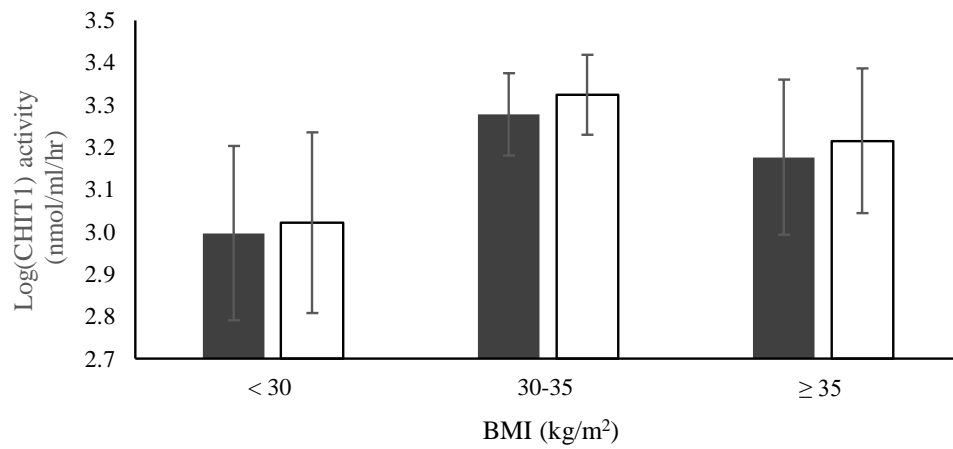

**Fig. S3. Mean  $\pm$  SEM a) CHI3L1 levels and b) CHIT1 activity before and after PAP treatment by three BMI groups.**

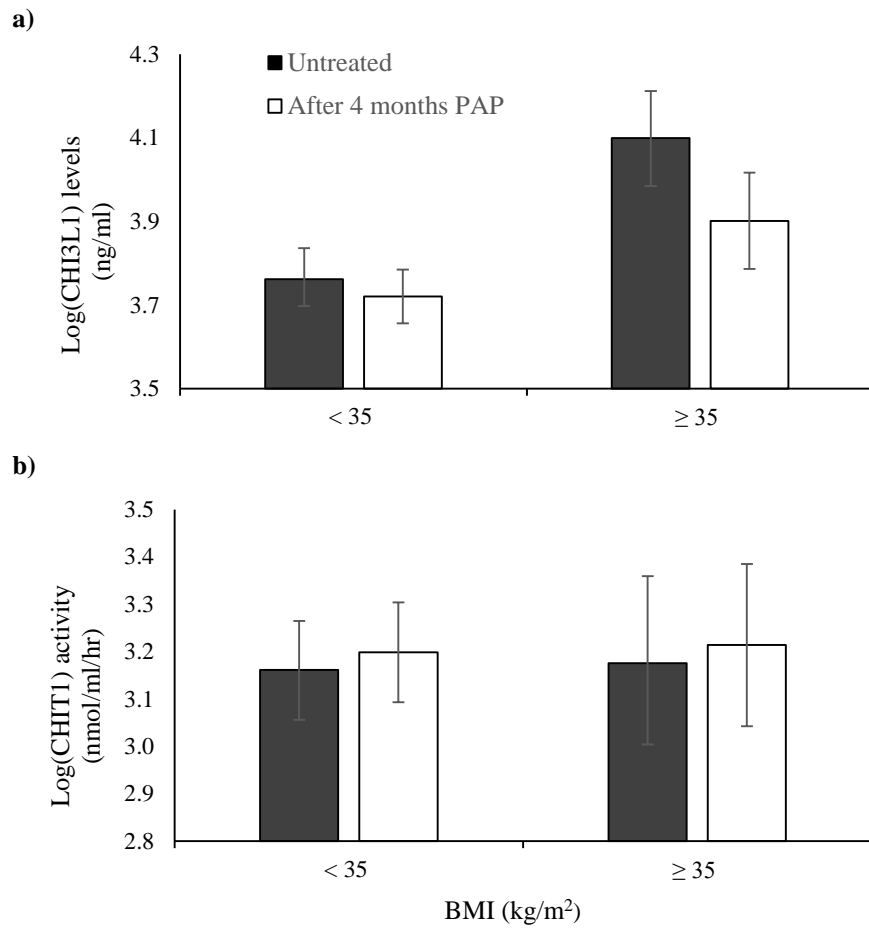

**Fig. S4. Mean  $\pm$  SEM a) CHI3L1 levels and b) CHIT1 activity before and after PAP treatment by two BMI groups, only including men (n=72) in the analysis.**
